# Supplementary material for: Heart Failure Prescribing Quality at Discharge from a Critical Care Unit in Egypt: The Impact of Multidisciplinary Care
Source: MDPI journal article supplement (doi:10.3390/pharmacy8030159), 2020-09-01
Supplement: s1 [file s1]

**Supplementary Table S1.** Baseline profile of patients receiving routine care and patients receiving multidisciplinary care, N = 284 patients.

| N = 284 Patients                           | Routine Care <sup>§</sup><br>(N = 170) | Multidisciplinary Care <sup>§</sup><br>(N = 114) | p-Value |
|--------------------------------------------|----------------------------------------|--------------------------------------------------|---------|
| <b>Clinical Profile</b>                    |                                        |                                                  |         |
| Age (years)                                | 66.8 ± 11.7                            | 66.6 ± 11.4                                      | 0.841   |
| Gender (male)                              | 90 (52.9%)                             | 61 (53.5%)                                       | 0.933   |
| Mean arterial pressure (mmHg)              | 94.9 ± 15.0                            | 94.9 ± 21.7                                      | 0.971   |
| Heart rate (bpm)                           | 89.1 ± 22.7                            | 79.8 ± 18.9                                      | <0.001  |
| HFrEF                                      | 58 (45%)                               | 42 (46.2%)                                       | 0.864   |
| Hypertension                               | 79 (46.5%)                             | 61 (53.5%)                                       | 0.255   |
| Atrial fibrillation                        | 39 (22.9%)                             | 70 (61.4%)                                       | <0.001  |
| Coronary artery disease                    | 72 (42.4%)                             | 60 (52.6%)                                       | 0.091   |
| Diabetes                                   | 71 (41.8%)                             | 59 (51.8%)                                       | 0.101   |
| Chronic kidney disease                     | 44 (25.9%)                             | 36 (31.6%)                                       | 0.303   |
| Asthma/COPD                                | 29 (17.1)                              | 35 (30.7)                                        | 0.071   |
| Number of Comorbidities                    | 5.1 ± 2.4                              | 5.4 ± 2.5                                        | 0.485   |
| <b>Clinical Status at Discharge</b>        |                                        |                                                  |         |
| Low blood pressure (<90/60 mmHg)           | 4 (2.4%)                               | 5 (5.7%)                                         | 0.187   |
| High blood pressure (>140/90 mmHg)         | 59 (35.5%)                             | 29 (33%)                                         | 0.685   |
| Heart rate < 70 bpm                        | 31 (18.2)                              | 56 (49.1)                                        | <0.001  |
| Heart rate > 100 bpm                       | 33 (19.4)                              | 4 (3.5)                                          | <0.001  |
| Hyperkalaemia (K <sup>+</sup> > 5.0 mg/dl) | 0 (0.0)                                | 9 (7.9)                                          | 0.103   |
| High blood urea nitrogen (>20 mg/dl)       | 74 (43.5)                              | 79 (69.3)                                        | <0.001  |
| High serum creatinine (> 2.5 mg/dl)        | 12 (7.1)                               | 19 (16.7)                                        | 0.199   |
| Length of stay                             | 9.6 ± 6.4                              | 10.2 ± 7.6                                       | 0.491   |

Comparisons were made between heart failure care provided before and after the implementation of a clinical pharmacy service at the critical care unit. Categorical variables are expressed as frequencies and percentages. Continuous variables are expressed as mean ± standard deviation. <sup>§</sup> Routine care refers to the medical care provided by the critical care physician only while multidisciplinary care refers to the medical care provided by the critical care physician and clinical pharmacist. bpm, beats per minute; COPD, chronic obstructive pulmonary disease; HFrEF, heart failure with reduced ejection fraction; K<sup>+</sup>, serum potassium.
